# Supplementary material
Source: PubMed Central journal article supplement (PMC5666086)
Supplement: halms1355378-supplement_1.pdf [file halms1355378-supplement_1.pdf]

**Supplementary Table 1 - Association between 10-year overall mortality and olive oil use stratified on sex in the elderly 3C Study cohort (8937): crude and adjusted hazard ratios (HR) and 95% CI**

| Olive oil use    | N    | Crude | (95% CI)    | p   | Model 1 <sup>a</sup> | (95% CI)    | p   | Model 2 <sup>b</sup> | (95% CI)    | p   |
|------------------|------|-------|-------------|-----|----------------------|-------------|-----|----------------------|-------------|-----|
| <i>All</i>       | 8937 |       |             |     |                      |             |     |                      |             |     |
| Moderate / None  |      | 0.79  | [0.71-0.88] | *** | 0.84                 | [0.76-0.94] | **  | 0.89                 | [0.80-0.99] | *   |
| Intensive / None |      | 0.76  | [0.68-0.84] | *** | 0.80                 | [0.71-0.90] | *** | 0.83                 | [0.74-0.63] | **  |
| <i>Women</i>     | 5448 |       |             |     |                      |             |     |                      |             |     |
| Moderate / None  |      | 0.75  | [0.64-0.87] | *** | 0.77                 | [0.64-0.90] | *** | 0.80                 | [0.68-0.94] | **  |
| Intensive / None |      | 0.67  | [0.57-0.79] | *** | 0.69                 | [0.58-0.81] | *** | 0.72                 | [0.60-0.85] | *** |
| <i>Men</i>       | 3489 |       |             |     |                      |             |     |                      |             |     |
| Moderate / None  |      | 0.87  | [0.75-1.01] | ns  | 0.90                 | [0.78-1.05] | ns  | 0.97                 | [0.83-1.13] | ns  |
| Intensive / None |      | 0.87  | [0.75-1.01] | ns  | 0.91                 | [0.78-1.06] | ns  | 0.94                 | [0.80-1.10] | ns  |

<sup>a</sup> Cox proportional model adjusted for sex, centre, education (no or primary/middle/ high school/university), income (<1500, >1500 euros/month), occupation (white collar/employee/blue collar/housewife)

<sup>b</sup> Cox proportional model adjusted for sex, centre, education, income, occupation, smoking, alcohol consumption, history of cardiovascular diseases, BMI, depression, diabetes, hypertension, hypercholesterolemia, dependence (IADL), self-rated health, self-rated diet quality, number of drugs, number of chronic diseases.

\*P<0.05; \*\*P<0.01; \*\*\*P<0.001; ns=not significant

**Supplementary Table 2 - Association between 10-year overall mortality (event N=1033) and dietary habits in the subgroup of the elderly cohort of the 3C Study with data on physical activity (only Dijon and Montpellier; N=5273): crude and adjusted hazard ratios (HR) and 95% CI**

| Dietary habits                                        | N    | Crude | (95% CI)    | p   | Model 1 <sup>a</sup> | (95% CI)    | p  | Model 2 <sup>b</sup> | (95% CI)    | p  |
|-------------------------------------------------------|------|-------|-------------|-----|----------------------|-------------|----|----------------------|-------------|----|
| At least 1 fruit and 1 vegetable cooked or raw/day    | 5273 | 0.83  | [0.73-0.94] | **  | 0.85                 | [0.74-0.96] | *  | 0.90                 | [0.79-1.03] | ns |
| Cooked fruits or vegetables: $\geq$ 4-6 servings/week | 5273 | 0.71  | [0.59-0.85] | *** | 0.76                 | [0.63-0.91] | ** | 0.75                 | [0.62-0.90] | ** |
| Meat: $\geq$ 1 serving/day                            | 5273 | 1.10  | [0.96-1.27] | ns  | 1.03                 | [0.89-1.19] | ns | 1.01                 | [0.87-1.16] | ns |
| Fish: $\geq$ 2 servings/week                          | 5273 | 0.85  | [0.75-0.96] | **  | 0.88                 | [0.78-1.00] | *  | 0.92                 | [0.81-1.04] | ns |
| Olive oil use                                         | 5273 |       |             |     |                      |             |    |                      |             |    |
| Moderate / None§                                      |      | 0.85  | [0.72-0.99] | *   | 0.89                 | [0.76-1.04] | ns | 0.97                 | [0.83-1.15] | ns |
| Intensive / None§                                     |      | 0.81  | [0.69-0.95] | **  | 0.85                 | [0.72-1.00] | *  | 0.90                 | [0.76-1.06] | ns |

<sup>a</sup> Cox proportional model adjusted for sex, centre, education (no or primary/middle/high school/university), monthly income (<1500, >1500 euros), occupation (white collar/employee/blue collar/housewife)

<sup>b</sup> Cox proportional model adjusted for sex, centre, education, income, occupation, smoking, alcohol consumption, history of cardiovascular diseases, BMI, depression, diabetes, [hypertension](#), [hypercholesterolemia](#), dependence, self-rated health, self-rated diet quality, number of medication, number of chronic diseases and [physical activity](#)

§reference      \*P<0.05; \*\*P<0.01; \*\*\*P<0.001; ns=not significant

**Supplementary Table 3 - Association between 10-year overall mortality (event N=1033) and diet diversity in the subgroup of the elderly cohort of the 3C Study with data on physical activity (only Dijon and Montpellier; N=5273): crude and multivariate adjusted of hazard ratios (HR) and 95%**

|                                | N    | Crude | (95% CI)    | p  | Model 1 <sup>a</sup> | (95% CI)    | p  | Model 2 <sup>b</sup> | (95% CI)    | p  |
|--------------------------------|------|-------|-------------|----|----------------------|-------------|----|----------------------|-------------|----|
| Diversity diet score 4-5 / 0-3 | 5273 | 0.90  | [0.79-1.02] | ns | 0.89                 | [0.78-1.02] | ns | 0.92                 | [0.80-1.05] | ns |
| Various fats > 3/≤ 3           | 5273 | 0.86  | [0.74-1.01] | ns | 0.88                 | [0.75-1.02] | ns | 0.90                 | [0.77-1.05] | ns |

<sup>a</sup> Cox proportional model adjusted for sex, centre, education (no or primary/middle/high school/university), monthly income (<1500, >1500 euros), occupation (white collar/employee/blue collar/housewife)

<sup>b</sup> Cox proportional model adjusted for sex, centre, education, income, occupation, smoking, alcohol consumption, history of cardiovascular diseases, BMI, depression, diabetes, hypertension, hypercholesterolemia, dependence, self-rated health, self-rated diet quality, number of medication, number of chronic diseases and physical activity

\*P<0.05; \*\*P<0.01; \*\*\*P<0.001; ns=not significant
